# Supplementary material for: Optimizing Moss and Lichen Transplants as Biomonitors of Airborne Anthropogenic Microfibers
Source: MDPI journal article supplement (doi:10.3390/biology12101278), 2023-09-25
Supplement: s1 [file s1]

Table S1 - N° of anthropogenic microfibers and relative lengths in POST-EXPOSURE and PRE-EXPOSURE moss and lichen

| Biomonitor    | Site | Bag portion | N of mfs | Average Length | Median±MAD - N of mfs | Median±MAD - Length |
|---------------|------|-------------|----------|----------------|-----------------------|---------------------|
| POST EXPOSURE |      |             |          |                |                       |                     |
| L             | Rr   | Th          | 60       | 1.34           | 65±2                  | 1.4±0.0             |
| L             | Rr   | Th          | 65       | 1.39           |                       |                     |
| L             | Rr   | Th          | 67       | 1.41           |                       |                     |
| L             | Rr   | N           | 21       | 1.85           | 24±2                  | 1.8±0.0             |
| L             | Rr   | N           | 24       | 1.86           |                       |                     |
| L             | Rr   | N           | 27       | 1.76           |                       |                     |
| L             | Rr   | All         | 81       | 1.47           | 89±4                  | 1.5±0.0             |
| L             | Rr   | All         | 89       | 1.52           |                       |                     |
| L             | Rr   | All         | 94       | 1.51           |                       |                     |
| L             | Pk   | Th          | 77       | 1.48           | 85±4                  | 1.3±0.1             |
| L             | Pk   | Th          | 85       | 1.22           |                       |                     |
| L             | Pk   | Th          | 88       | 1.34           |                       |                     |
| L             | Pk   | N           | 29       | 1.56           | 30±2                  | 1.6±0.1             |
| L             | Pk   | N           | 35       | 1.71           |                       |                     |
| L             | Pk   | N           | 30       | 1.54           |                       |                     |
| L             | Pk   | All         | 106      | 1.50           | 118±5                 | 1.4±0.1             |
| L             | Pk   | All         | 120      | 1.36           |                       |                     |
| L             | Pk   | All         | 118      | 1.39           |                       |                     |
| L             | Rf   | Th          | 69       | 1.44           | 76±3                  | 1.3±0.1             |
| L             | Rf   | Th          | 79       | 1.29           |                       |                     |
| L             | Rf   | Th          | 76       | 1.26           |                       |                     |
| L             | Rf   | N           | 20       | 1.61           | 20±3                  | 1.6±0.1             |
| L             | Rf   | N           | 16       | 1.46           |                       |                     |
| L             | Rf   | N           | 24       | 1.84           |                       |                     |
| L             | Rf   | All         | 89       | 1.48           | 95±4                  | 1.4±0.1             |
| L             | Rf   | All         | 95       | 1.32           |                       |                     |
| L             | Rf   | All         | 100      | 1.40           |                       |                     |
| M             | Rr   | Th          | 85       | 1.29           | 85±2                  | 1.3±0.0             |
| M             | Rr   | Th          | 84       | 1.22           |                       |                     |
| M             | Rr   | Th          | 90       | 1.28           |                       |                     |
| M             | Rr   | N           | 29       | 1.42           | 22±3                  | 1.41±0.11           |
| M             | Rr   | N           | 22       | 1.41           |                       |                     |
| M             | Rr   | N           | 21       | 1.09           |                       |                     |
| M             | Rr   | All         | 114      | 1.32           | 111±3                 | 1.3±0.1             |
| M             | Rr   | All         | 106      | 1.26           |                       |                     |
| M             | Rr   | All         | 111      | 1.21           |                       |                     |
| M             | Pk   | Th          | 102      | 1.02           | 106±3                 | 1.0±0.0             |
| M             | Pk   | Th          | 112      | 1.03           |                       |                     |
| M             | Pk   | Th          | 106      | 0.97           |                       |                     |
| M             | Pk   | N           | 34       | 1.26           | 36±2                  | 1.3±0.0             |
| M             | Pk   | N           | 40       | 1.34           |                       |                     |
| M             | Pk   | N           | 36       | 1.26           |                       |                     |
| M             | Pk   | All         | 136      | 1.09           | 142±5                 | 1.1±0.0             |
| M             | Pk   | All         | 152      | 1.11           |                       |                     |
| M             | Pk   | All         | 142      | 1.04           |                       |                     |
| M             | Rf   | Th          | 65       | 1.30           | 72±6                  | 1.3±0.0             |
| M             | Rf   | Th          | 72       | 1.31           |                       |                     |
| M             | Rf   | Th          | 83       | 1.33           |                       |                     |
| M             | Rf   | N           | 35       | 1.53           | 38±2                  | 1.5±0.1             |
| M             | Rf   | N           | 42       | 1.40           |                       |                     |
| M             | Rf   | N           | 38       | 1.49           |                       |                     |
| M             | Rf   | All         | 100      | 1.38           | 114±7                 | 1.4±0.0             |
| M             | Rf   | All         | 114      | 1.34           |                       |                     |
| M             | Rf   | All         | 121      | 1.38           |                       |                     |
| PRE EXPOSURE  |      |             |          |                |                       |                     |
| M             |      |             | 45       | 1.12           | 37±4.8                | 1.12±0.104          |
| M             |      |             | 28       | 1.02           |                       |                     |
| M             |      |             | 37       | 1.07           |                       |                     |
| M             |      |             | 37       | 1.22           |                       |                     |
| M             |      |             | 44       | 1.39           |                       |                     |
| L             |      |             | 78       | 1.14           | 58±8                  | 1.24±0.076          |
| L             |      |             | 58       | 1.12           |                       |                     |
| L             |      |             | 60       | 1.35           |                       |                     |
| L             |      |             | 47       | 1.29           |                       |                     |
| L             |      |             | 51       | 1.24           |                       |                     |

| Biomonitor    | Bag portion | N of mfs | Average Length | Median±MAD - N of mfs | Median±MAD - Lenght |
|---------------|-------------|----------|----------------|-----------------------|---------------------|
| POST EXPOSURE |             |          |                |                       |                     |
| L             | Th          | 69       | 1.44           | 76±3                  | 1.3±0.1             |
| L             | Th          | 79       | 1.29           |                       |                     |
| L             | Th          | 76       | 1.26           |                       |                     |
| L             | N           | 20       | 1.61           | 20±23                 | 1.6±0.1             |
| L             | N           | 16       | 1.46           |                       |                     |
| L             | N           | 24       | 1.84           |                       |                     |
| L             | All         | 89       | 1.48           | 95±4                  | 1.4±0.1             |
| L             | All         | 95       | 1.32           |                       |                     |
| L             | All         | 100      | 1.40           |                       |                     |
| L             | Naked       | 84       | 1.09           | 90±5                  | 1.2±0.1             |
| L             | Naked       | 100      | 1.36           |                       |                     |
| L             | Naked       | 90       | 1.17           |                       |                     |
| M             | Th          | 65       | 1.30           | 72±6                  | 1.3±0.0             |
| M             | Th          | 72       | 1.31           |                       |                     |
| M             | Th          | 83       | 1.33           |                       |                     |
| M             | N           | 35       | 1.53           | 38±2                  | 1.5±0.1             |
| M             | N           | 42       | 1.40           |                       |                     |
| M             | N           | 38       | 1.49           |                       |                     |
| M             | All         | 100      | 1.38           | 114±7                 | 1.4±0.1             |
| M             | All         | 114      | 1.34           |                       |                     |
| M             | All         | 121      | 1.38           |                       |                     |
| M             | Naked       | 94       | 1.34           | 104±9                 | 1.5±0.1             |
| M             | Naked       | 120      | 1.51           |                       |                     |
| M             | Naked       | 104      | 1.46           |                       |                     |
